# 1            **Dissecting Transition Cells from Single-cell Transcriptome**

## 2            **Data through Multiscale Stochastic Dynamics**

3            Peijie Zhou<sup>1,2</sup>, Shuxiong Wang<sup>2</sup>, Tiejun Li<sup>1, \*</sup>, Qing Nie<sup>2,3, \*</sup>

4            <sup>1</sup> LMAM and School of Mathematical Sciences, Peking University, Beijing 100871, China

5            <sup>2</sup> Department of Mathematics, University of California, Irvine, Irvine, CA 92697, USA

6            <sup>3</sup> Department of Cell and Developmental Biology, University of California, Irvine, Irvine, CA

7            92697, USA

8            \* Correspondence: [tieli@pku.edu.cn](mailto:tieli@pku.edu.cn) (T.L.), [qnie@uci.edu](mailto:qnie@uci.edu) (Q.N.)

### 9            **Abstract**

10          Advances of single-cell technologies allow scrutinizing of heterogeneous cell states,  
11          however, analyzing transitions from snap-shot single-cell transcriptome data remains  
12          challenging. To investigate cells with transient properties or mixed identities, we  
13          present MuTrans, a method based on multiscale reduction technique for the underlying  
14          stochastic dynamical systems that prescribes cell-fate transitions. By iteratively  
15          unifying transition dynamics across multiple scales, MuTrans constructs the cell-fate  
16          dynamical manifold that depicts progression of cell-state transition, and distinguishes  
17          meta-stable and transition cells. In addition, MuTrans quantifies the likelihood of all  
18          possible transition trajectories between cell states using the coarse-grained transition  
19          path theory. Downstream analysis identifies distinct genes that mark the transient states  
20          or drive the transitions. Mathematical analysis reveals consistency of the method with  
21          the well-established Langevin equation and transition rate theory. Applying MuTrans  
22          to datasets collected from five different single-cell experimental platforms and  
23          benchmarking with seven existing tools, we show its capability and scalability to  
24          robustly unravel complex cell fate dynamics induced by transition cells in systems such  
25          as tumor EMT, iPSC differentiation and blood cell differentiation. Overall, our method  
26          bridges data-driven and model-based approaches on cell-fate transitions at single-cell  
27          resolution.

28

## 29 **Introduction**

30 Advances in single-cell transcriptome techniques allow us to inspect cell states and cell-  
31 state transitions at fine resolution (1), and the notion of *transition cells* (aka. hybrid  
32 state, or intermediate state cells) starts to draw increasing attention (2-4). Transition  
33 cells are characterized by their transient dynamics during cell-fate switch (3), or their  
34 mixed identities from multiple cell states (5), different from the well-defined meta-  
35 stable cells (6, 7) that usually express marker genes with distinct biological functions.  
36 Transition cells are conceived vital in many important biological processes, such as  
37 tissue development, blood cell generation, cancer metastasis or drug resistance (8).

38

39 Despite the rapid algorithmic progress in single-cell data analysis (9), it remains  
40 challenging to probe transition cells accurately and robustly from single-cell  
41 transcriptome datasets. Often, the transition cells are rare and dynamic, and herein  
42 difficult to be captured by static dimension-reduction methods (10). High-accuracy  
43 clustering methods (e.g. SC3 (11) and SIMLR (12)) tend to enforce distinct cell states,  
44 placing transient cells into different clusters, therefore only applicable to the cases of  
45 sharp cell-state transition (**Figure 1a, top**). While popular pseudotime ordering  
46 methods (13), such as DPT (7), Slingshot (14) and Monocle (15), presumes either  
47 discrete (**Figure 1a, top**) or continuous cell-state transition (**Figure 1a, middle**),  
48 quantitative discrimination between meta-stable and transition cells is lacking (7).  
49 Recently, soft-clustering techniques provides a way to estimate the level of “mixture”

50 of multiple cell states (16), however, the linear or static models embedded in such  
51 approach make it difficult to capture dynamical properties of cells.

52

53 Dynamic modeling provides a natural way to characterize transition cells (3), allowing  
54 multiscale description of cell-fate transition (**Figure 1a, bottom and S1**). Such models  
55 analogize cells undergoing transition to particles confined in multiple potential wells  
56 with randomness (17, 18), for which the transient states correspond to saddle points and  
57 the metastable states correspond to attractor basins of the underlying dynamical system  
58 (**Figure 1b**). In such description, the stochastic gene dynamics at individual cell scale  
59 can induce cell-state switch at macroscopic cell cluster or phenotype scale, and the  
60 transition cells form “bridges” between meta-stable states (**Figure 1c**). Despite widely  
61 use of dynamical systems concepts to illustrate cell-fate decision (4), direct inference  
62 via dynamical models for transitions from single-cell transcriptome data is lacking.

63

64 Here we employ noise-perturbed dynamical systems (19) with a multiscale approach  
65 on cell-fate conversion (20) to analyze single-cell transcriptome data. By characterizing  
66 meta-stable cells in attractor basins and placing the transition cells along transition  
67 paths connecting the meta-stable states through saddle points, our **multiscale** method  
68 for **transient** cells (MuTrans) prescribes a stochastic dynamical system for a given  
69 dataset (**Figure 1b**). Using the single-cell expression matrix as input, through  
70 iteratively constructing and integrating cellular random walks across three scales

71 (**Figure 1d** and **S2**), MuTrans finds most probable path tree (MPPT) for cell transitions  
72 in a reconstructed cell-fate *dynamical manifold* (**Figure 1e**). Such manifold, similar to  
73 the classical Waddington landscape (21) often used to highlight transitions, provides an  
74 intuitive visualization of cell dynamics compared to commonly adopted low-dimension  
75 *geometrical manifold*. In the dynamical manifold, the barrier height naturally quantifies  
76 the likelihood of cell-fate switch, and a Transition Cell Score (TCS) allows us to  
77 distinguish meta-stable and transition cells (**Figure 1e**). We then illustrate the complex  
78 cell transition trajectories on dynamical manifold using the dominant transition paths  
79 obtained for the coarse-grained dynamics. With such quantification, we are able to  
80 identify critical genes that are transition driver (TD genes), mark the  
81 intermediate/hybrid states (IH genes) or meta-stable cells (MS genes) (**Figure 1e** and  
82 **S3**). To speed up calculations for datasets consisting of large number of cells (22, 23),  
83 MuTrans provides an additional (and optional) aggregation module in pre-processing.  
84 This module aggregates cells into many small groups that share similar dynamical  
85 properties, thus MuTrans can take the transition probabilities among these coarse-  
86 grained “cells” as the input, instead of the random walk on original cells, in order to  
87 reduce the computational cost (**Method and SM Section 2.6**).

88

89 We demonstrate the effectiveness and robustness of MuTrans in seven single-cell  
90 transcriptome datasets, including simulation data and sequencing data generated by five  
91 different experimental platforms. Benchmarking and comparisons with seven existing

92 single-cell lineage inference tools validates the capability and scalability of MuTrans  
93 in probing complex, sometimes subtle, cell-fate transition dynamics. We also perform  
94 mathematical analysis to show consistency of MuTrans with the over-damped Langevin  
95 dynamics (24) -- a popular model for state transitions in physical or biochemical  
96 systems (19).

97

## 98 **Results**

### 99 **Overview of MuTrans**

100 MuTrans depicts cells and their transitions in a given single-cell transcriptome dataset  
101 as a multiscale dynamical system (**Figure 1a-c**). Taking the input as pre-processed  
102 single-cell gene expression matrix, MuTrans first learns the cellular random walk  
103 transition probability matrix (rwTPM) on the cell-cell scale through the Gaussian-like  
104 kernel (**Figure 1d and Methods**), which yields the continuous limit of over-damped  
105 Langevin Equation to model cell-fate decision (**Methods and Section 1 in SM**). Next,  
106 the method performs coarse-graining on the cell-cell scale rwTPM to learn the  
107 dynamics on the cluster-cluster scale, and acquires attractor basins and their mutual  
108 conversion probabilities simultaneously (**Figure 1d and Methods**). Theoretically, this  
109 step is asymptotically consistent with the Kramers' law of reaction rate for over-damped  
110 Langevin systems (**Methods and Section 1.2 in SM**). Finally, we specify the relative  
111 position of each cell in the attractor basins with the cell-cluster resolution view of

112 Langevin dynamics, which is constructed via optimizing a cell-cluster membership  
113 matrix (**Figure 1d and Methods**).

114

115 In the downstream analysis (Transcendental Procedure, **Figure 1e**), we construct the  
116 most probable path tree (MPPT) to infer cell lineage based on the coarse-grained  
117 transition probabilities (**Figure 1e and SM Section 2.4**). To robustly depict the lineage  
118 relationships, we use the transition path theory to quantify the likelihood of all possible  
119 transition trajectories between cell states (**Methods and Section 2.4 in SM**).

120

121 Combining the optimized cell-cluster membership matrix, MuTrans fits a dynamical  
122 manifold using mixture distribution to make meta-stable cells reside in the attractor  
123 basins while assign transition cells along the transition paths connecting different basins  
124 (**Figure 1e and Methods**), which is inspired by the Gaussian mixture approximation  
125 toward the steady-state distribution of the Fokker-Planck equation associated with the  
126 over-damped Langevin dynamics (**Methods and Section 2.3 in SM**).

127

128 For each cell-state transition, we can calculate a transition cell score (TCS) ranging  
129 between one and zero to quantitatively distinguish meta-stable and transition cells  
130 (**Figure 1e and Methods**). Finally, we systematically classify three types of genes (MS,  
131 IH and TD) during the transition whose expression dynamics differ between meta-  
132 stable and transition cells (**Figure 1e and Methods**). Specifically, the TD genes varies

133 accordingly with the TCS within transition cells, and the IH genes co-express in both  
134 metastable and transition cells, while MS genes express uniquely in the meta-stable  
135 states.

136

137 To deal with the large-scale datasets, in addition to common strategies such as sub-  
138 sampling cells, we provide an option to speed up calculation by introducing a pre-  
139 processing aggregation module DECLARE (dynamics-preserving cells aggregation).

140 This module assigns the original individual cells into many (e.g. hundreds or thousands)  
141 microscopic meta-stable states and computes the transition probabilities among them,  
142 and thus it can be used as an input to MuTrans instead of the cell-cell rwTPM (**Methods**  
143 **and Section 2.6 in SM**). Both theoretical and numerical analysis suggest that,  
144 compared to the common strategy of averaging of gene expression profiles of a small  
145 group of cells, DECLARE better preserves the structure of dynamical landscape with a  
146 good approximation to the transition paths probabilities calculated without using  
147 DECLARE (**Figure 5, Methods and Section 2.6 in SM**).

148

#### 149 **Validation in two-state simulation data and three-state EMT system**

150 We first validated the performance of MuTrans on single-cell data generated from  
151 relatively simple cell-state transition dynamics. To test accuracy and robustness of our  
152 method, we simulated the stochastic state-transition process using a bifurcation model  
153 in the regime of intermediate noise level (25). The gene expression of each cell was

154 simulated with over-damped Langevin equation driven by an extrinsic signal and noise  
155 (**Section 3.1 in SM**). In certain parameter range, the model consists of two stable states  
156 and one unstable saddle states (**Figure 2a**). Noise in gene expression induced the switch  
157 prior to the bifurcation point, resulting in a thin layer of transition cells (**Figure 2a**).  
158 Applying MuTrans to the known transition cells and meta-stable cells in the model, we  
159 found the computed transition cell score (TCS) captured the underlying saddle-node  
160 bifurcation structure (**Figure 2a**). For cells fluctuating around the two stable branches,  
161 the TCS approaches one or zero respectively, indicating the meta-stability of cell states.  
162 The transition cells that surpasses the saddle point region in the trajectory yields a  
163 continuum of TCS between zero and one, with scores consistent with the relative  
164 positions of cells along the trajectory (**Figure 2a**).  
165  
166 We then applied MuTrans to a single-cell RNA sequencing dataset (26) of tumor  
167 epithelial-to-mesenchymal transition (EMT) generated by Smart-Seq2 platform  
168 (**Figure 2b and S4-S7**). Three cell states were detected, including epithelial (E) state  
169 and mesenchymal (M) state, manifesting as the adjacent basins in the dynamical  
170 manifold, with identified EMT transition cells moving in-between (**Figure 2b, Figure**  
171 **S4-S6**). The transition cells were characterized by the groups of IH genes without  
172 observing significant TD genes (**Figure 2b**), agreeing well with the experimentally  
173 measured “hybrid genes” of EMT cells and the role of IH in transition (26). Compared  
174 with previous selected marker genes, we identified consistent MS markers such as



175 Epcam, Cdh1 and Mm9, and IH markers such as Trp63 and Pdgfra (**Table S4 and S5**).

176 It is interesting to note that the previously identified hybrid gene Krt14 was assigned

177 into the MS group (**Table S4**), however, with low statistical significance, indicating its

178 potential resemblance with IH genes. This agrees well with an ATAC-seq analysis (26),

179 showing the chromatin regions of Krt14 and Krt17 in transition cells, although

180 remained open, were actually in reduced levels. The analysis also indicates that the

181 trajectory from epithelial state to mesenchymal state mediated by transition cells has a

182 larger probability flux than the path surpassing another low-expression state (**Figure**

183 3c).

184

### 185 **Scrutinizing bifurcation dynamics during iPSC induction**

186 We next used MuTrans to investigate cell fate bifurcations (**Figure 3a**) in a single-cell

187 dataset for induced pluripotent stem cells (iPSCs) toward cardiomyocytes (27). In the

188 learned cellular random walk across different scales, the rwTPM on cell-cluster scale

189 recovers finer resolution of rwTPM on the cell-cell scale than the cluster-cluster scale

190 (**Figure 3b, top**). MuTrans identified nine attractor basins (**Figure 3b, bottom left**),

191 and the constructed most probable path tree (**MPPT, Figure S7**) reveals a lineage with

192 bifurcation into mesodermal (M) or endodermal (En) cell fates. Two previously

193 unfound states, located prior to the bifurcation of primitive streak (PS) into

194 differentiated mesodermal (M) or endodermal (En) cell fates in the MPPT, were

195 denoted as Pre-M and Pre-En states (**Figure 3b and S7**). On the inferred dynamical

196 manifold (**Figure 3c**), the cells make transitions between two states, suggesting  
197 possible dynamic conversion between the two types of precursor cells that seem to be  
198 very plastic. In comparison, the transition between mature En and M states are rare,  
199 indicating the stability of En and M cells. Along the differentiation trajectory from PS  
200 to Pre-M, the coarse-grained transition probability, quantified by the heights of barrier,  
201 shows a stronger transition capability from PS to Pre-M than from Pre-M to PS (**Figure**  
202 **3b** and **S7**). In addition, the transition from Pre-M to M was found to be sharper than  
203 the one from PS to Pre-M. The transitions from PS to Pre-En and from Pre-En to En  
204 exhibit similar behavior.

205

206 Downstream analysis on gene expression profiles indicates three transition stages from  
207 Pre-M to M (**Figure 3d**). The initial stage was characterized by downregulation of  
208 meta-stable (MS) genes from the Pre-M state markers (enriched in the pathways of  
209 endodermal development) and upregulation of intermediate-hybrid (IH) genes  
210 (enriched in pathways of MAPK cascade and metabolic process) from the M state  
211 markers (**Table S6 in SM and Figure 3e**). This process by first losing En identity  
212 enables a conversion of Pre-M meta-stable cells toward the transition cells. The second  
213 stage of the transition marked by the gradual down-regulation of TD genes mainly  
214 involves negative regulation of cardiac muscle cell differentiation and cardiac muscle  
215 tissue development (**Table S6 in SM and Figure 3e**). The final stage completes the  
216 transition process with the down-regulation of Pre-M state IH genes, along with up-

217 regulation of MS genes (enriched in the cardiac muscle cell myoblast differentiation  
218 and outflow tract morphogenesis process) in the M state (**Table S6 in SM and Figure**  
219 **3e**), making transition cells to finally convert into the mesodermal cells and establish  
220 the meta-stable cell fate. The ordering of cells based on TCS has an overall increasing  
221 trend from Day 2 to Day 3 via the time point of Day 2.5 within the transition cells,  
222 corresponding to the noticed three-stage transition (**Figure S8**). Together, the transition  
223 cells locating near the saddle points connecting Pre-M (or Pre-En) and M (or En) reflect  
224 the temporal orderings of cell-fate conversion, which are well characterized by TD and  
225 IH genes in a system consisting of one pitchfork bifurcation.

226

### 227 **MuTrans robustly resolves complex lineage dynamics in blood cell differentiation**

228 The hematopoiesis has been conceived as a hierarchy of discrete binary state-transitions,  
229 while increasing evidence alternatively supports a continuous and heterogeneous view  
230 of such process (28). To investigate the complex dynamics in blood differentiation  
231 where transition cells likely play key roles, we applied MuTrans to three different  
232 single-cell datasets with different sequencing depths and sample sizes.

233

234 We first analyzed the single-cell RNA data during myelopoiesis sequenced with  
235 Fluidigm C1 platform (29). Notably MuTrans highlights the hub states in the inferred  
236 MPPT cell lineage (**Figure 4a** and **Figure S10**), capable of becoming three types of  
237 blood cells through a shallow basin resided in the highest terrain of the entire dynamical

238 manifold (**Figure S11**). The low barriers between the multi-lineage basin and the  
239 downstream basins (granulocytic or monocytic states) suggest probable transitions  
240 from the multi-lineage state, consistent with the observed transition cells across the  
241 saddle point. Interestingly, the transition cells during Multi-lin to Gran conversion were  
242 previously identified as the multi-lineage cells in ICGS clustering (29) (**Figure S11**).  
243 Similarly, during the megakaryocytic cell differentiation, while the transition cells  
244 consist of both HSPC1 and Meg types in our analysis, they were previously identified  
245 as the hematopoietic progenitor cells by the ICGS criterion (**Figure S11**). Such  
246 discrepancy could be explained by the gene expression dynamics in gradual transition  
247 of cell states. For example, during transition from multi-lineage cells to granulocytic  
248 cells (**Figure 4c**), we observed the typical expression pattern of TD, MS and IH genes  
249 as conceptualized in **Figure 1e**. Despite the similarity between the transition cells and  
250 their departing multi-lin state as manifested in the co-expression of down-regulated IH  
251 genes (bottom panel in **Figure 4c, yellow lines**), we also detected the up-regulated IH  
252 genes (middle panel in **Figure 4c, yellow lines**), suggesting the resemblance of  
253 transition cells with their targeting gran cell state (**Table S7**). We observed a similar  
254 gene expression pattern in the transition from HSPC to Meg state (**Figure S13** and  
255 **Table S8**). For this dataset, MuTrans is able to capture the established meta-stable states,  
256 in addition to finding transition cells that were classified in some meta-stable states by  
257 a previous study (29).

258

259 Focusing on the cell-fate bias toward lymphoid lineage, MuTrans resolves the complex  
260 lineage dynamics underlying single-cell RNA data of mouse hematopoietic progenitors  
261 differentiation sequenced from Cel-Seq2 platform (30). Consistent with the major  
262 finding of FateID algorithm, the constructed dynamical manifold reveals that lymphoid  
263 progenitor (LP) cells (red balls) give rise to both B cells (pink balls) and plasmacytoid  
264 dendritic cells (pDCs) (**Figure 4b** and **S14**). The inferred MPPT and dynamical  
265 manifold also suggests that certain transition cells in the attractors of pDCs originate  
266 directly from multi-potent progenitor (MPP) cells (yellow balls, **Figure S14**).  
267 Interestingly, MuTrans resolve the details in B cell differentiation, capturing the  
268 transition cells from Pro-B toward Pre-B basins (**Figure S14** and **Table S9**).  
269 Downstream analysis validated the transition cells by the co-expressed IH genes  
270 (yellow lines, **Figure 4c right**) and the dynamically expressed TD genes (green lines,  
271 **Figure 4c right**). Overall, MuTrans provides a clear global cell-fate transition picture  
272 with marked transition cells in this dataset of highly complex lineages, in contrast to  
273 the local transition routes inferred by FateID (30).

274

### 275 **Application to large-scale datasets with complex trajectory**

276 To test the scalability of MuTrans, we studied on the single-cell hematopoietic  
277 differentiation data in human bone marrow generated by 10x Chromium platform (31)  
278 (**Figure 5a**). To make the comparison, we applied MuTrans to both the complete

279 (original) data, and the one after using the pre-processing module DECLARE. We  
280 found DECLARE could reduce the calculation time by one magnitude for this dataset.

281

282 For both cases MuTrans identified the expected bifurcations from hematopoietic stem  
283 progenitor cells (HSPC) into the monocytic precursors and erythroid cells, as well as  
284 the differentiation from precursor cells into monocytic and dendritic cells. The  
285 constructed dynamical manifold (**Figure 5bc, Figure S15**) shows a continuous stream  
286 of transition cells among different basins (such as those moving between dendritic and  
287 monocytic potential wells) suggesting the hematopoietic differentiation may be a  
288 continuous process. The transition trajectories obtained with the large-scale pre-  
289 processing step are consistent with the complete dataset analysis (**Figure 5bc**). This  
290 indicates the major transition trajectories toward dendritic cell fate not only consist of  
291 the path mediated by monocytic precursor states but also include a considerable flux of  
292 transition cells from differentiated monocytic cells. Interestingly, the existence of both  
293 meta-stable states and transition cells reconciles a previously noted discrepancy (31)  
294 caused by treating the underlying cellular transition dynamics as either a purely  
295 continuous processing (e.g. using Palantir) or a discrete process (using other clustering-  
296 based lineage inference methods such as Slingshot (14) and PAGA (32)).

297

298 Next, we analyzed another dataset containing over 15,000 cells collected during blood  
299 emergence in mouse gastrulation (33) (Figure 6a). Consistent with the PAGA (32)

300 representation of the data (Figure 6b), the constructed dynamical manifold (Figure 6c)  
301 and derived most probable flow tree (MPFT) suggest three major transition branches  
302 from haemato-endothelial (Haem) cells into endothelial cells (EC), mesoderm cells  
303 (Mes) or erythroid cells (Ery). Specifically, the transition path analysis indicates that  
304 the endothelial cells and erythroid cells are originated through discrete trajectories from  
305 haemogenic endothelium (Figure 6e), and such trajectories are mediated by the  
306 intermediate state of blood progenitor (BP) cells (Figure 6f). These results are  
307 consistent with the experimental findings on endothelial and erythroid cells (33).

308

### 309 **Comparison with other Methods**

310 MuTrans is designed specifically to identify transition cells, with its associated  
311 dynamical manifold to allow easy visualization of the cell state transitions. Next we  
312 compared it with other intuitive approaches, including pseudotime ordering and cell-  
313 fate bias probability, for the detection of transition cells. We also benchmarked with  
314 seven existing methods for their capacity to unravel complex cell lineages during  
315 differentiation (**SM Section 4**).

316

317 In iPSC data, we found only MuTrans, PAGA and VarID recovered the bifurcation  
318 dynamics toward En and M states (**Figure S16**). However, the cell lineage graphs of  
319 PAGA and VarID include false-positive links that are unlikely to exist between cells  
320 collected at different time in experiments. While the projected lineage tree of StemID2

321 shows transition cells between precursor and mature En/M states (**Figure S16**), the  
322 reconstructed spanning tree does not reveal the overall bifurcation structure.

323

324 For myelopoiesis dataset, we found that only MuTrans and VarID constructed the  
325 bifurcations toward granulocytic or monocytic states (**Figure S17**), despite that VarID  
326 cannot distinguish the megakaryocytic and erythrocytic cells. FateID faithfully captures  
327 the differentiation paths toward monocytic states, while lacking accuracy of revealing  
328 the transitions into the granulocytic lineage (**Figure S17**).

329

330 Close inspection into the transition from precursors to mature En/M states in iPSC  
331 dataset suggests that the intuitive approaches (such as tracking the changes along  
332 pseudotime or fate bias probability) could not distinguish the transition cells from meta-  
333 stable cells as accurately and reliably as MuTrans. Both Monocle3 and DPT have a  
334 sharp increase in the pseudotime during the transitions (**Figure S18**), therefore lacking  
335 resolution in probing the transition cells linking multiple meta-stable states. Fate ID  
336 suggests a gradual change of En/M fate probability in precursor cells (**Figure S18**), not  
337 discriminating the transition cells within Pre-En and Pre-M states. Such problem was  
338 also observed when using Palantir, which depicts the entire cell-state transition as a  
339 highly continuous and gradual process (**Figure S18**).

340

341



## 342 **Discussion**

343 Overall, MuTrans provides a unified approach to inspect cellular dynamics and to  
344 identify transition cells directly from single-cell transcriptome data across multiple  
345 scales. Central to the method is an underlying stochastic dynamic system that naturally  
346 connects attractor basins with meta-stable states, saddle points with transient states, and  
347 most probable paths with cell lineages. Instead of the widely used low-dimensional  
348 geometrical manifold approximation for the high-dimensional single-cell data, our  
349 method constructs a novel cell-fate dynamical manifold to visualize dynamics of cells  
350 development, allowing direct characterization of transition cells that move across  
351 barriers amid different meta-stable basins. Adopting the transition path theory to the  
352 multiscale dynamical system, we quantify the relative likelihoods of various transition  
353 trajectories that connect a chosen root state and the target meta-stable states. In addition,  
354 we provide a quantitative methodology to detect critical genes that drive transitions or  
355 mark meta-stable cells.

356  
357 In this study a key theoretical assumption for modeling cell-state transition is a barrier-  
358 crossing picture in multi-stable dynamical systems, a concept which has been adopted  
359 previously (3, 34, 35). Indeed, the “barriers”, “saddles” and “potential landscape”  
360 underlying the actual biological process are the emergent properties of the complex  
361 interactions, such as gene expression regulation and signal transduction during a  
362 developmental process (36). The driving force that overcomes the barrier and induces  
363 the transition may arise from both the extrinsic environment and the fluctuations within  
364 the cells (37). Multi-scale reductions used by MuTrans naturally capture the transition  
365 cells, allowing inference of the corresponding transition processes.

366

367 Methods such as Palantir (31), Population Balance Analysis (PBA) (38) and  
368 Topographer (39) also treat cell-fate transition as the Markov random walk process.  
369 Unlike MuTrans, these methods only depict the dynamics at the individual cell level,  
370 lacking the capability of MuTrans to 1) resolve the intrinsic multiscale features of the  
371 system, 2) distinguish between meta-stable and transition cells, and 3) quantify the  
372 complex routes of development paths. Several other methods (2, 40) define the  
373 transition probability between clusters based on entropy difference or cell-cell  
374 transition probabilities. In comparison, the cluster-cluster scale transition probability in  
375 MuTrans is an emergent multiscale quantity derived from coarse-graining procedure,  
376 quantitatively consistent with Kramers' reaction rate theory for over-damped Langevin  
377 dynamics (**Methods and SM**). By using such approach on transition cells, we are able  
378 to reconcile previously noted discrepancies in blood differentiation via analyzing three  
379 different datasets collected by different sequencing technologies.

380

381 Pseudotime ordering may serve as an intuitive tool to trace the progression of cell state  
382 transitions by comparing similarity of the gene expression among cells. Such  
383 approaches often adopt the deterministic point of view on cell-fate transitions, failing  
384 to distinguish between transition and meta-stable cells (**Figure 1a and S19**). In contrast,  
385 MuTrans embraces the stochastic model of cell-state transition. While cells reside and  
386 fluctuate within meta-stable states for the majority of time, it is the temporal ordering

387 of transient transition cells, rather than meta-stable cells, reflect the actual process of  
388 cell transitions (**Figure 1c and Figure S19**).

389

390 To describe the smooth state transitions, several other methods (41, 42) adopt the soft-  
391 clustering strategy based on the soft K-means or factor decomposition for gene  
392 expression matrix. In comparison, the soft cell assignment of MuTrans is obtained from  
393 multiscale learning of cell-cluster rwTPM, which can be more robust against technical  
394 noise than using gene expression matrix directly for clustering (7). Such robustness is  
395 critical to detecting transition cells in datasets with lower sequencing depth, such as  
396 10X data. Beyond interpreting the soft membership function as the indicator of cell  
397 locations in attractor basins, it remains an interesting problem to derive its continuous  
398 limit in the embedded over-damped Langevin dynamical systems.

399

400 To deal with the emerging large-scale scRNA-seq datasets, MuTrans introduces a pre-  
401 processing method (DECLARE) to aggregate the cells and speed up computation. The  
402 aggregation method uses the coarse-grain approach consistent with MuTrans, and it is  
403 different from other methods often used for large scRNA-seq datasets, such as down-  
404 sampling convolution (43) or kNN partition (44) that is based on the averaging or  
405 summation of cells with similar gene expression profiles. As a result, DECLARE can  
406 be naturally integrated with dynamical manifold construction and transition trajectory  
407 inference.

408

409 Admittedly, the physical picture of MuTrans cannot explain all the possible cell  
410 transition scenarios. For instance, the barrier-crossing mechanism is not sufficient to  
411 capture the oscillatory processes such as cell cycle (38). Instead of constructing cell-  
412 cell scale random walk with a pure diffusion-like kernel on transcriptome data, such  
413 non-equilibrium process might be accounted for by single-cell RNA velocity (18, 45,  
414 46), thereafter a multi-scale reduction approach can naturally apply (47). Effective  
415 ways in root cell states detection (e.g. through entropy methods (48) or RNA velocity  
416 (46)) can also enhance the robustness of our method.

417

418 In the meantime, the back and forth stochastic transitions among meta-stable states may  
419 need to be combined with deterministic processes in order to better understand the cell-  
420 fate decision (49). The local fluctuations of microscopic cell states in gene expression  
421 can be prevalent in the dynamics, and the cell-cell scale random walk becomes a natural  
422 assumption. In theory, the stochastic transition model is consistent with the uni-  
423 direction process if the transition probabilities in one direction are dominant or when  
424 the noise amplitude of system is relatively small.

425

426 In addition to infer complex cellular dynamics induced by transition cells from single-  
427 cell transcriptome data, MuTrans along with its computational or theoretical  
428 components can be used for development of other approaches for dissecting cell-fate  
429 transitions from both data-driven and model-based perspectives.

430

## 431 **Methods**

432 MuTrans performs three major tasks in order to reveal the dynamics underneath single-  
433 cell transcriptome data (**Figure 1**): 1) assigning each cell in the attractor basins of an  
434 underlying dynamical system, 2) quantifying the barrier heights across the attractor  
435 basins, and 3) identifying relative positions of the cells within each attractor. The first  
436 two tasks are executed simultaneously through the coarse-graining of multi-scale  
437 cellular random walks, an alternative approach to the traditional clustering of cells and  
438 inference of cell lineage. The third task is achieved by refining the coarse-grained  
439 dynamics via soft clustering, and serves as a critical procedure to identifying the  
440 transition cells during cell-fate conversion.

441

### 442 **Multi-scale analysis of the random-walk transition probability matrix (rwTPM)**

443 We assume the underlying stochastic dynamics during cell-fate conversion be modeled  
444 by random walks among individual cells through the random-walk transition  
445 probability matrix (**rwTPM**). Dependent on the choices of either cell-level or cluster-  
446 level, the rwTPM can be constructed in different resolutions, exhibiting multi-scale  
447 property and leading the identification of transition cells from the meta-stable cells.

448 In describing the method, we use the indices  $x, y, z$  to denote individual cells and  
449  $i, j, k$  to represents the clusters (or cell states) for the simplicity of notations.

450

451 *The rwTPM in the cell-cell resolution*

452 The rwTPM  $p$  of cellular stochastic transition can be directly constructed from the  
453 gene expression matrix in cell-cell resolution, with the form

$$454 \quad p(x, y) = \frac{w(x, y)}{d(x)}, d(x) = \sum_z w(x, z). \quad (1)$$

455 where the weight  $w(x, y)$  denotes the affinity of gene expression profile in cell  $x$  and  
456  $y$  (**Section 2.1 in SM**). Such microscopic random walk yields an equilibrium probability  
457 distribution  $\mu(x) = \frac{d(x)}{\sum_z d(z)}$ , satisfying the detailed-balance condition  $\mu(x)p(x, y) =$   
458  $\mu(y)p(y, x)$ . The rwTPM captures the cellular transition in the cell-cell resolution  
459 (**Figures 1d**).

#### 460 The rwTPM in the cluster-cluster resolution

461 The cellular transition rwTPM can be lifted in the cluster-cluster resolution by adopting  
462 a macroscopic perspective. For example, the cell-to-cell rwTPM can be generated from  
463 certain coarse-grained dynamics, by assigning each cell in different clusters  $S =$   
464  $\cup_{k=1}^K S_k$ , and model the transitions as the Markov Chain among clusters with the  
465 transition probability matrix  $\hat{P} = (\hat{P}_{ij})_{K \times K}$ . Here  $\hat{P}_{ij}$  denote the probability that the  
466 cells reside in the state of cluster  $S_i$  switch to the state of cluster  $S_j$ . Denote  $1_{S_k}(z)$   
467 as the indicator function of cluster  $S_k$  such that  $1_{S_k}(z) = 1$  for cell  $z \in S_k$  and  
468  $1_{S_k}(z) = 0$  otherwise. The cluster-cluster transition based on probability matrix  $\hat{P}$  can  
469 naturally induce another rwTPM  $\hat{p}$  with the form

$$470 \quad \hat{p}(x, y) = \sum_{i,j} 1_{S_i}(x) \hat{P}_{ij} 1_{S_j}(y) \frac{\mu(y)}{\hat{\mu}_j}, \quad (2)$$

471 where  $\hat{\mu}_j = \sum_y 1_{S_j}(y) \mu(y)$  is the stationary probability distribution of cluster  $S_j$ .

472 Intuitively, the stochastic transition from cell  $x \in S_i$  to  $y \in S_j$  can be decomposed

473 into a two-stage process: a cell switches cellular state from cluster  $S_i$  to  $S_j$  with  
474 probability  $\hat{P}_{ij}$ , and then becomes the cell  $y$  in cluster  $S_j$  according to its relative  
475 portion at equilibrium  $\frac{\mu(y)}{\tilde{\mu}_j}$ . The rwTPM captures the cellular transition in the cluster-  
476 cluster resolution (**Figures 1d**).

#### 477 The rwTPM in the cell-cluster resolution

478 Because some cells, for example the transition cells, may not be characterized by their  
479 locations in one basin, we introduce a membership function  $\rho(x) =$   
480  $(\rho_1(x), \rho_2(x), \dots, \rho_K(x))^T$  for each cell  $x$  to quantify its uncertainty in clustering.  
481 The element  $\rho_k(x)$  represents the probability that the cell  $x$  belongs to cluster  $S_k^*$   
482 with  $\sum_k \rho_k(x) = 1$ . For the cell possessing mixed cluster identities, its membership  
483 function  $\rho(x)$  might have several significant positive components, suggesting its  
484 potential origin and destination during the transition process. In terms of dynamical  
485 system interpretation, the membership function captures the finite-noise effect in over-  
486 damped Langevin equation, which introduces the uncertainty of transition paths across  
487 saddle points (50), revealing that cells near saddle points and stable points may exhibit  
488 different behaviors in the state-transition dynamics.

489 From the coarse-grained dynamics  $(\{S_k\}_{k=1}^K, \{\hat{P}_{ij}\}_{i,j=1}^K)$  and the measurement of cell  
490 identity uncertainty  $\rho_k(x)$  in the clusters, one can reinterpret the induced microscopic  
491 random walk  $\tilde{p}$  in a cell-cluster resolution as

$$492 \quad \tilde{p}(x, y) = \sum_{i,j} \rho_i(x) \hat{P}_{ij} \rho_j(y) \frac{\mu(y)}{\tilde{\mu}_j}, \tilde{\mu}_j = \sum_x \rho_j(x) \mu(x), \quad (3)$$

493 in parallel to Equation (2). Now the transition from cell  $x$  to  $y$  is realized in all the  
494 possible channels from attractor basin  $S_i$  to  $S_j$  with the probability  $\rho_i(x)\rho_j(y)$ . The  
495 underlying rationale is that the transition can be decomposed in a three-stage process:  
496 First we pick up cell starting in attractor basin with membership probability, then  
497 conduct the transition with coarse-grained probability between attractor basins, and  
498 finalize the process by picking the target cell with membership probability in the target  
499 attractor basin. Now the rwTPM captures cellular transition in the cell-cluster resolution  
500 **(Figures 1d)**.

### 501 Integrating the rwTPM at three levels

502 To integrate the rwTPM from different resolutions, we next optimize the rwTPM on  
503 cluster-cluster and cell-cluster level through approximating the original rwTPM in the  
504 cell-cell resolution. First, we seek an optimal coarse-grained reduction that minimizes  
505 the distance between  $\hat{p}[S_k, \hat{P}_{ij}]$  and  $p$  by solving an optimization problem:

$$506 \quad \min_{S_k, \hat{P}_{ij}} \mathcal{J}[S_k, \hat{P}_{ij}] = \|\hat{p}[S_k, \hat{P}_{ij}] - p\|_{\mu}^2, \quad (4)$$

507 where  $\mu$  is the stationary distribution of original cell-cell random walk  $p$ , and  $\|\cdot\|_{\mu}$   
508 is the Hilbert-Schmidt norm (51) for transition probability matrix  $\mathcal{P}$ , defined as  
509  $\|\mathcal{P}\|_{\mu}^2 = \sum_{x,y} \frac{\mu(x)}{\mu(y)} \mathcal{P}(x,y)^2$ . The optimization problem is solved via an iteration scheme  
510 for  $S_k$  and  $\hat{P}_{ij}$  respectively **(Section 2 in SM)**. The optimal coarse-grained  
511 approximation  $(S_k^*, \hat{P}_{ij}^*)$  indicates the distinct clusters of cells and their mutual  
512 conversion probability. Provided with the starting state, we can infer the cell lineage



513 from the Most Probable Path Tree (MPPT) approach or Maximum Probability Flow  
514 Tree (MPFT) approach (**Section 2 in SM**).

515 Next, we optimize the membership  $\rho_k(x)$  such that the distance between the cell-  
516 cluster rwTPM  $\tilde{p}$  and the original  $p$  is minimized, i.e.

$$517 \quad \min_{\rho_k} \mathcal{E}[\rho_k] = \|\tilde{p}[\rho_k] - p\|_{\mu}^2 \quad (5)$$

$$518 \quad \text{s. t.} \quad \sum_k \rho_k(x) = 1, \rho_k(x) \geq 0 \text{ for } k = 1, \dots, K \text{ and } x \in S$$

519 with the initial condition  $\rho_i^0(x) = 1_{S_i^*}(x)$ , and  $\tilde{p}[\rho_k]$  is defined from (3) by plugging  
520 in the obtained  $\hat{P}_{ij}^*$ . The optimization problem is solved by the quasi-Newton method  
521 (**Section 2.2 in SM**). The obtained membership function  $\rho^*(x)$  specifies the relative  
522 position of the cells within each attractor basin and is optimal in the sense that it  
523 guarantees the closest approximation of cell-cluster level rwTPM toward the cell-cell  
524 level transition dynamics.

525

## 526 **Transition Paths Quantification and Comparison**

527 To quantify the cell lineages we use the transition path theory based on coarse-grained  
528 dynamics  $(\{S_k\}_{k=1}^K, \{\hat{P}_{ij}\}_{i,j=1}^K)$  to compare the likelihood of all possible transition  
529 trajectories. Given the set of starting states  $A$  and the targeting state  $B$ , we calculate  
530 the effective current  $f_{ij}^+$  of transition paths surpassing from state  $S_i$  to  $S_j$  (**Section**  
531 **2.4.1 in SM**), and specify the capacity of given development route  $w_{dr} =$   
532  $(S_{i_0}, S_{i_1}, \dots, S_{i_n})$  connecting sets  $A$  and  $B$  as  $c(w_{dr}) = \min_{0 \leq k \leq n-1} f_{i_k i_{k+1}}^+$ . The  
533 likelihood of transition trajectory  $w_{dr}$  is defined as the proportion of its capacity to

534 the sum of all possible trajectory capacities. In the python package of MuTrans, we use  
535 the functions in PyEMMA (52) for the computations.

536

### 537 **Pre-processing by DECLARE and Scalability to Large Datasets**

538 To reduce the computational cost for the large datasets (for instance, greater than 10K  
539 cells), we introduce a pre-processing module DECLARE (dynamics-preserving cell  
540 aggregation). The module first detects the hundreds/thousands of *microscopic* meta-  
541 stable states by clustering (e.g. using K-means or kNN partition) and then derive the  
542 coarse-grained transition probabilities among these *microscopic* meta-stable states.  
543 Based on such transition probabilities, we then follow the standard multiscale reduction  
544 procedure of MuTrans to find *macroscopic* meta-stable states, construct dynamical  
545 manifold, quantify the transition trajectories and highlight the transition states (**Section**  
546 **2.5 in SM**).

547

### 548 **Transition Cells and Genes Analysis through Transcendental**

549 Based on the soft clustering results, MuTrans performs the Transcendental  
550 (**t**ransition **c**ells **a**nd **r**elevant **a**nalysis) procedure to identify the transition cells from  
551 the meta-stable cells, and reveal the relevant marker genes.

552 For the given transition process from cluster  $S_i^*$  to  $S_j^*$  on the MPPT tree, we first  
553 selected the cells relevant to the transition, based on the membership function  $\rho^*(x)$

554 (Section 2.4 in SM). Then for each *relevant* cell  $x$ , we define the transition cell score

555 (TCS)

556 
$$\tau_{ij}(x) = \frac{\rho_i^*(x)}{\rho_i^*(x) + \rho_j^*(x)}, \quad (6)$$

557 to measure the relative position of cell  $x$  in different clusters. Here the TCS  $\tau_{ij}$  takes

558 the values near zero or one when a cell resides around the attractor in  $S_i^*$  or  $S_j^*$  (i.e.

559 the cells are in the meta-stable states), whereas yields the intermediate value between

560 zero and one for the cell that possesses a hybrid or transient identity of two or more

561 clusters. Next we arrange all the relevant cells in state  $S_i^*$  and  $S_j^*$  according to  $\tau_{ij}$  in

562 descending order, and the reordered  $\tau_{ij}$  indicates a sharp transition (**Figure 1a**) or a

563 smooth transition (**Figure 1a**) from the value one to zero. For the smooth transition,

564 there is a group of cells whose value of  $\tau_{ij}$  decreases gradually from one to zero

565 (**Figure 1e**). This group of cells in the transition layer are called the **transition cells**

566 from state  $S_i^*$  to state  $S_j^*$ , and their order reflects the details of the state-transition

567 process. To quantify the transition steepness, we use logistic functions to model the

568 transition and estimate the relative abundance of transition cells (**Section 2.4 in SM**).

569 Differentially expressed genes analysis is usually applicable when the clusters are

570 distinct and the state-transition is sharp (**Figure 1a**). However, to characterize the

571 dynamical and hybrid gene expression profiles in transition cells, merely comparing the

572 average gene expression in different clusters is insufficient. Here we define three kinds

573 of genes relevant to the state transition of cells: a) the **transition-driver (TD)** genes

574 that vary accordingly with the transition dynamics, b) the **intermediate-hybrid (IH)**

575 genes marking the hybrid features from multiple cell states that are expressed in the  
576 intermediate transition cells, and c) the **meta-stable (MS)** genes that represent cells in  
577 the meta-stable states.

578 The expression of **TD** genes varies accordingly to the transition, revealing the driving  
579 mechanism of the cell-state conversion. To probe **TD** genes, we calculate the  
580 correlation between the gene expression values and  $\tau_{ij}$  in the ordered transition cells.  
581 The genes with larger correlation values (larger than a given threshold value) are  
582 identified as **TD** genes. The **IH** genes express eminently both in the transition cells and  
583 in the meta-stable cells from one specific cluster, reflecting the hybrid state of the  
584 transition cells, while the **MS** genes express exclusively in the meta-stable cells from  
585 certain cluster. To distinguish **IH** and **MS** genes from all the differentially expressed  
586 genes, we compare the gene expression values between the meta-stable cells and the  
587 transition cells, respectively, within each cluster. The significantly up-regulated genes  
588 in the meta-stable cells are defined as the **MS** genes, and the rest differentially  
589 expressed genes are identified as the **IH** genes that express simultaneously both in  
590 meta-stable and transition cells (**Section 2.4 in SM**).

591

## 592 **Constructing the cell-fate dynamical manifold**

593 To better visualize the transition process and their connections with cell states, MuTrans  
594 introduces the dynamical manifold concept. The construction of the dynamical  
595 manifold consists of two steps: 1) locating the center positions of cell clusters

596 (corresponding to the attractors) in low dimensional space, 2) assigning the position of  
597 each individual cells according to soft-clustering membership function.

598 The initial center-determination step starts with an appropriate two-dimensional  
599 representation, denoted as  $x^{2D}$  for each cell  $x$  (details in **Section 2.3 in SM**). Instead  
600 of directly utilizing  $x^{2D}$  as the cell coordinate, we calculate the center  $\psi_k$  of each  
601 cluster  $\{S_k^*\}_{k=1}^K$  by taking the average of  $x^{2D}$  over cells within certain range of cluster  
602 membership function  $\rho_k^*(x)$ . Having determined the position of attractors, we define a  
603 two-dimensional embedding  $\xi(x)$  for each cell according to the membership function  
604  $\rho^*(x)$ , such that  $\xi(x) = \sum_k \rho_k^*(x) \psi_k \in R^2$ . For the cell possessing mixed identities  
605 of state  $S_i^*$  and  $S_j^*$ , its transition coordinate then lies in a value between  $\psi_i$  and  $\psi_j$ .

606 For Fokker-Planck equation of the over-damped Langevin equation, the expansion of  
607 steady-state solution near stable points (attractors) indeed yields a Gaussian-mixture  
608 distribution (53). Motivated by this, to obtain the global dynamical manifold we fit a  
609 Gaussian mixture model with a mixture weight  $\hat{\mu}^*$  to obtain the stationary distribution  
610 of coarse-grained dynamics. The probability distribution function of the mixture model  
611 becomes

$$612 \quad p(z) = \sum_k \hat{\mu}_k^* \mathcal{N}(z; \psi_k, \Lambda_k), \quad (7)$$

613 where  $\mathcal{N}(z; \psi_k, \Lambda_k)$  is a two-dimension Gaussian probability distribution density  
614 function with mean  $\psi_k$  and covariance  $\Lambda_k$ . The landscape function of dynamical  
615 manifold is then naturally takes the form in two dimensions  $\varphi(z) = -\ln p(z)$ .  
616 Specifically, the “energy” of individual cell  $x$  is calculated as  $\varphi(\xi(x))$ . The

617 constructed landscape function captures the multi-scale stochastic dynamics of cell-fate  
618 transition, by allowing typical cells that are distinctive to certain cell states positioned  
619 in the basin around corresponding attractors, while the transition cells laid along the  
620 connecting path between attractors across the saddle point. Moreover, the relative depth  
621 of the attractor basin reflects the stationary distribution of coarse-grained dynamics,  
622 depicting the relative stability of the cell states. The flatness of the attractor basin also  
623 reveals the abundance and distribution of transition cells, indicating the sharpness of  
624 cell fate switch.

625

## 626 **Mathematical Analysis of MuTrans**

627 With the assumption that the single-cell data is collected from the probability  
628 distribution  $\nu(x)$  with density of Boltzmann-Gibbs form, i.e.,  $\nu(x) \propto e^{-\frac{U(x)}{\varepsilon}}$ , we can  
629 prove (**Section 1 in SM**) that the microscopic random walk constructed by MuTrans  
630 approximates the dynamics of over-damped Langevin Equation (OLE)

$$631 \quad dX_t = -\nabla U(X_t)dt + \sqrt{2\varepsilon}dW_t \quad (8)$$

632 in the limiting scheme, and the coarse-graining of MuTrans  $(S_k, \hat{P}_{ij})$  is equivalent to  
633 the model reduction of OLE by Kramers' rate formula in the small noise regime, i.e.  
634  $k_{ij} \propto e^{-\frac{\Delta U}{\varepsilon}}$  as  $\varepsilon \rightarrow 0$ , where  $k_{ij}$  is the switch rate from attractor  $S_i$  to  $S_j$ , and  $\Delta U$   
635 denotes the corresponding barrier height of transition -- the energy difference between  
636 saddle point and the departing attractor.

637 Therefore, if the cell transition dynamics can be well-modelled by the OLE dynamics  
638 of Equation (8), MuTrans is indeed the multi-scale model reduction of (8) via the data-  
639 driven approach. In addition, the dynamical manifold constructed by MuTrans can be  
640 viewed as the data realization of potential landscape (34) for diffusion process in  
641 biochemical modelling, which incorporates the dynamical clues about the underlying  
642 stochastic system regarding the stationary distribution and transition barrier heights.

643

#### 644 **Data availability**

645 All the datasets used in this paper are publicly available. The mouse cancer EMT data  
646 (Smart-Seq2) is from GSE110357, mouse myelopoiesis data (Fluidigm C1) from  
647 GSE7024, mouse hematopoietic progenitors data (Cel-Seq2) from GSE100037, human  
648 hematopoietic progenitors data (10X Chromium) from the data link in original  
649 publication (31), blood differentiation data (10X Chromium) in mouse gastrulation  
650 from <https://github.com/MarioniLab/EmbryoTimecourse2018>, and iPSC  
651 differentiation data (single-cell RT-qPCR) downloaded from  
652 [https://www.pnas.org/highwire/filestream/29285/field\\_highwire\\_adjunct\\_files/1/pnas.](https://www.pnas.org/highwire/filestream/29285/field_highwire_adjunct_files/1/pnas.1621412114.sd02.xlsx)  
653 [1621412114.sd02.xlsx](https://www.pnas.org/highwire/filestream/29285/field_highwire_adjunct_files/1/pnas.1621412114.sd02.xlsx). The codes and trajectories for simulation data, the processed  
654 single-cell data expression matrix, the MuTrans package and scripts to reproduce the  
655 figures and results in main text and repeat the detailed analysis in SI are also available  
656 at Github (<https://github.com/cliffzhou92/MuTrans-release>).

657

658 **Code availability**

659 The Matlab implementation of MuTrans and affiliated Transcendental packages are  
660 available from GitHub (<https://github.com/cliffzhou92/MuTrans-release>). The Python  
661 package for MuTrans (pyMuTrans) compatible with AnnData object is also available  
662 in the repository.

663

664

665 **Acknowledgements**

666 We thank Dr. Suoqin Jin and Jifan Shi for helpful discussions. We also thank the  
667 reviewers for their insightful suggestions. This project was supported by grants from  
668 the National Natural Science Foundation of China (11825102 and 11421101 to T.L.),  
669 National Institutes of Health grant U01AR073159 (Q.N.), National Science Foundation  
670 grants DMS1763272 (Q.N.) and MCB2028424 (Q.N.), and The Simons Foundation  
671 (594598 to Q.N.) of USA. T.L. is also partially supported by the Beijing Academy of  
672 Artificial Intelligence (BAAI). P.Z. also received the support from Study Abroad  
673 Program and Elite Program of Computational and Applied Mathematics for Ph.D.  
674 students of Peking University.

675

676 **Author contributions**

677 Q.N., T.L. and P.Z. conceived the project; P.Z. and T.L. designed the algorithm and  
678 wrote the code; P.Z. and S.W. conducted the data analyses; P.Z. wrote the



679 supplementary material; all the authors wrote and approved the manuscript. Q.N. and

680 T.L. supervised the research.

681

682 **Declaration of Interests**

683 The authors declare no competing interests.

## Figure Legends

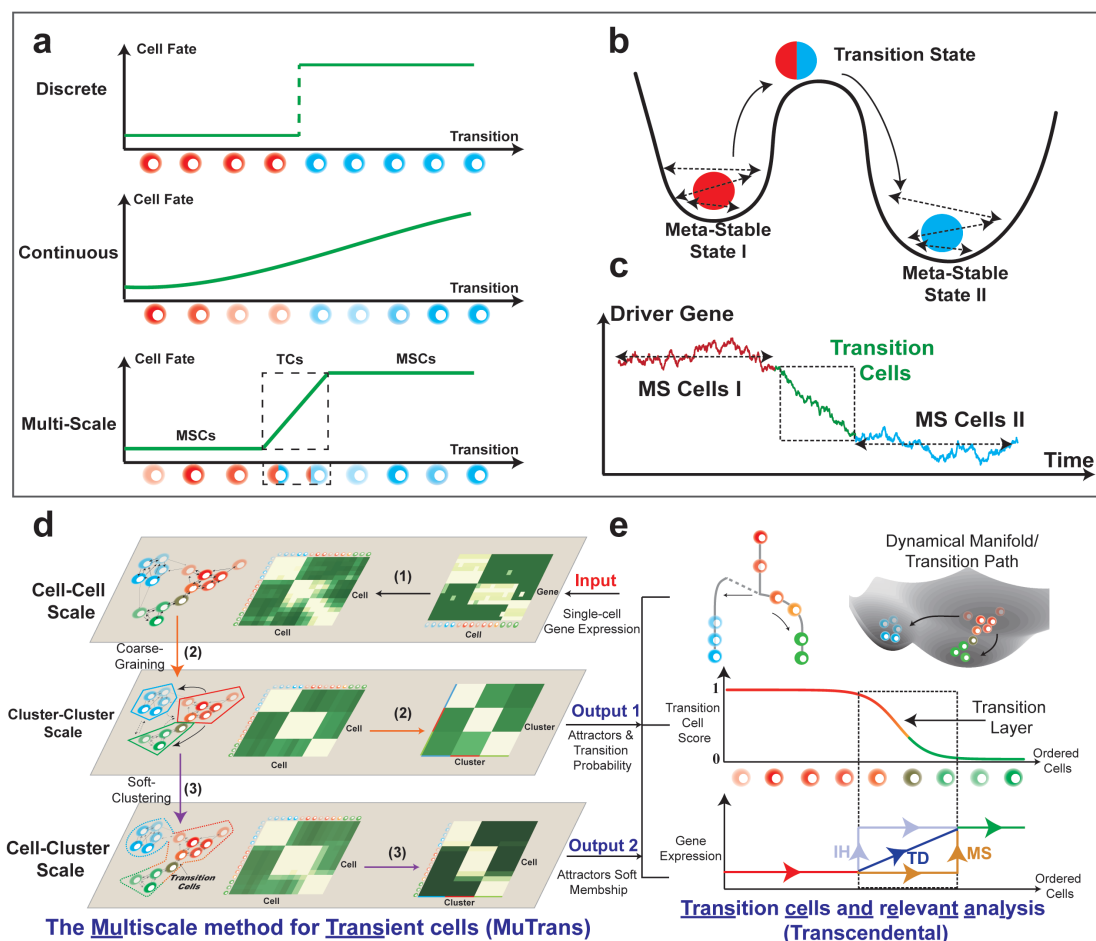

**Figure 1.** Brief introduction to *MuTrans*. (a-c) Theoretical foundation of *MuTrans* -- the multi-scale stochastic dynamics approach to model cell-fate transitions. (a) Three possible perspectives to describe cell-fate transition, as either entirely discrete (top) or continuous (middle) process, or as the multi-scale switch process between meta-stable states mediated by transition cells (bottom). The first two perspectives correspond to clustering or pseudotime ordering commonly adopted in single-cell analysis. (b) Biophysical foundation of the multi-scale perspective to treat cell-fate transition as over-damped Langevin dynamics in the multi-stable potential wells. The meta-stable states correspond to the attractor basins while the transition states are modelled by the saddle points of underlying dynamical system. (c) A typical gene expression trajectory of multi-scale dynamics. The expression of driver genes fluctuates within the meta-stable cells, while witnesses the continuous yet temporary change within transition cells, forming a transition layer in trajectory. (d-e) The procedure and downstream analysis of *MuTrans*. (d) The procedure of iterative multi-scale learning. The input is the pre-processed single-cell gene expression matrix. The three major steps (indicated by the number on arrow) for iterative learning of the stochastic dynamics across three different scales: (1) learning the cell-cell scale random walk transition probability matrix (rwTPM) from expression data, (2) learning the cluster-cluster scale rwTPM by coarse-graining the cell-cell scale rwTPM, and (3) learning the cell-cluster scale rwTPM by

soft-clustering the cluster-cluster scale rwTPM. The output of iterative multi-scale learning includes the cell attractor basins and their mutual transition probabilities, as well as the membership matrix indicating relative cell positions in different attractors. (e) Downstream analysis (Transcendental Procedure). Given the output of iterative multi-scale learning, MuTrans constructs the cell lineage, dynamical manifold and transition paths manifesting the underlying transition dynamics of cell-fate (top). For each state-transition process, MuTrans explicitly distinguishes between meta-stable and transition cells via TCS (middle). The transition cells are marked with dashed squares. Based on the TCS ordering of cells, MuTrans identifies three types of genes (**MS**, **IH** and **TD**) during the transition whose expression dynamics differ in meta-stable and transition cells (bottom).

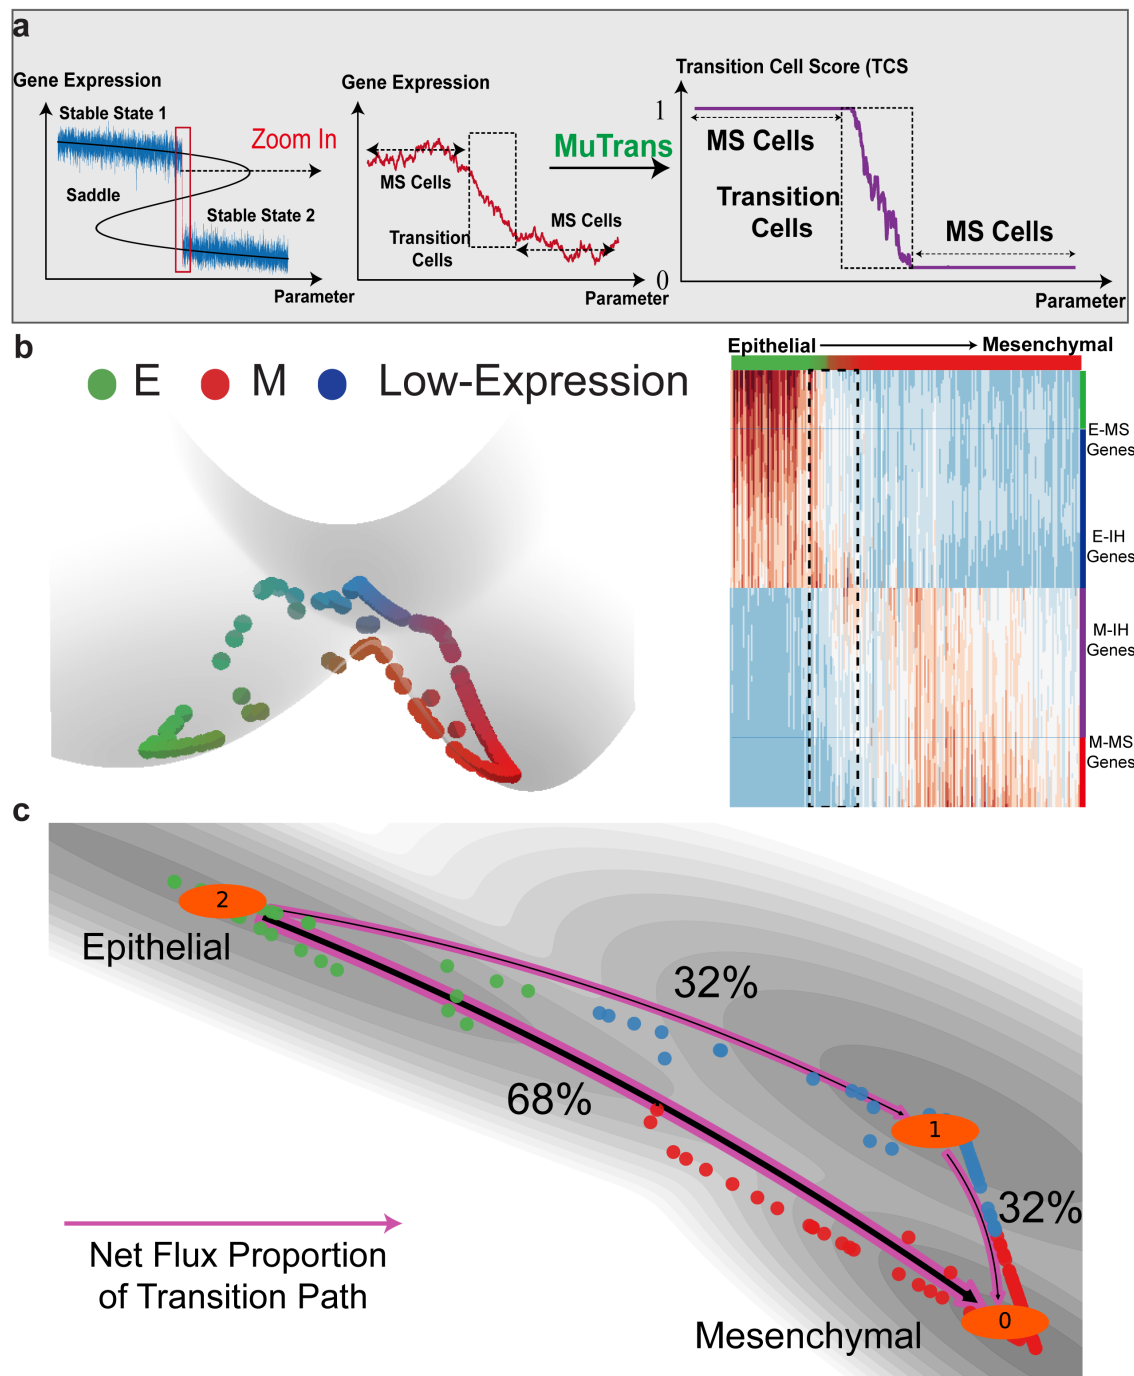

**Figure 2.** Validation of MuTrans in two-state transition simulation data and three-state EMT single-cell RNA-seq data. (a) MuTrans distinguishes the meta-stable and transition cells simulated using a stochastic saddle-bifurcation model. (top, left) The data generated by the model. (Blue lines) The simulated trajectories as the input data. (Black Lines) Bifurcation plot of the underlying dynamical system. (Red Lines) The trajectory points corresponding to the transition cells that are switching between two states. (top, right) The zoomed-in trajectory of the transition cell region. (bottom) The

TCS values for transition cells. The meta-stable cells have TCS of value 0 or 1, while the TCS of transition cells decrease from 1 to 0 during transition. (b) MuTrans distinguishes between MS and IH genes, and resolves dynamics during epithelial-mesenchymal transition (EMT) mediated by transition cells. (top) The constructed dynamical manifold reveals the existence and transitions among three cell states. (bottom) The Transcendental analysis of EMT, with the genes (rows) grouped by IH or MS, is consistent with previous findings (exact names and details shown in **Table S2** and **S3**), cells (columns) ordered by TCS, and transition cells marked by the black dashed rectangles. No significant TD genes are detected during the transition. The color-map from blue to red represents low to high gene expression values. (c) The transition path analysis by setting E as start state and M as target state, overlaid on the two-dimensional dynamical manifold. The numbers are the relative likelihood of each transition path. The direct transition from E to M across the barrier of transition is the dominant path with larger transition path flux.

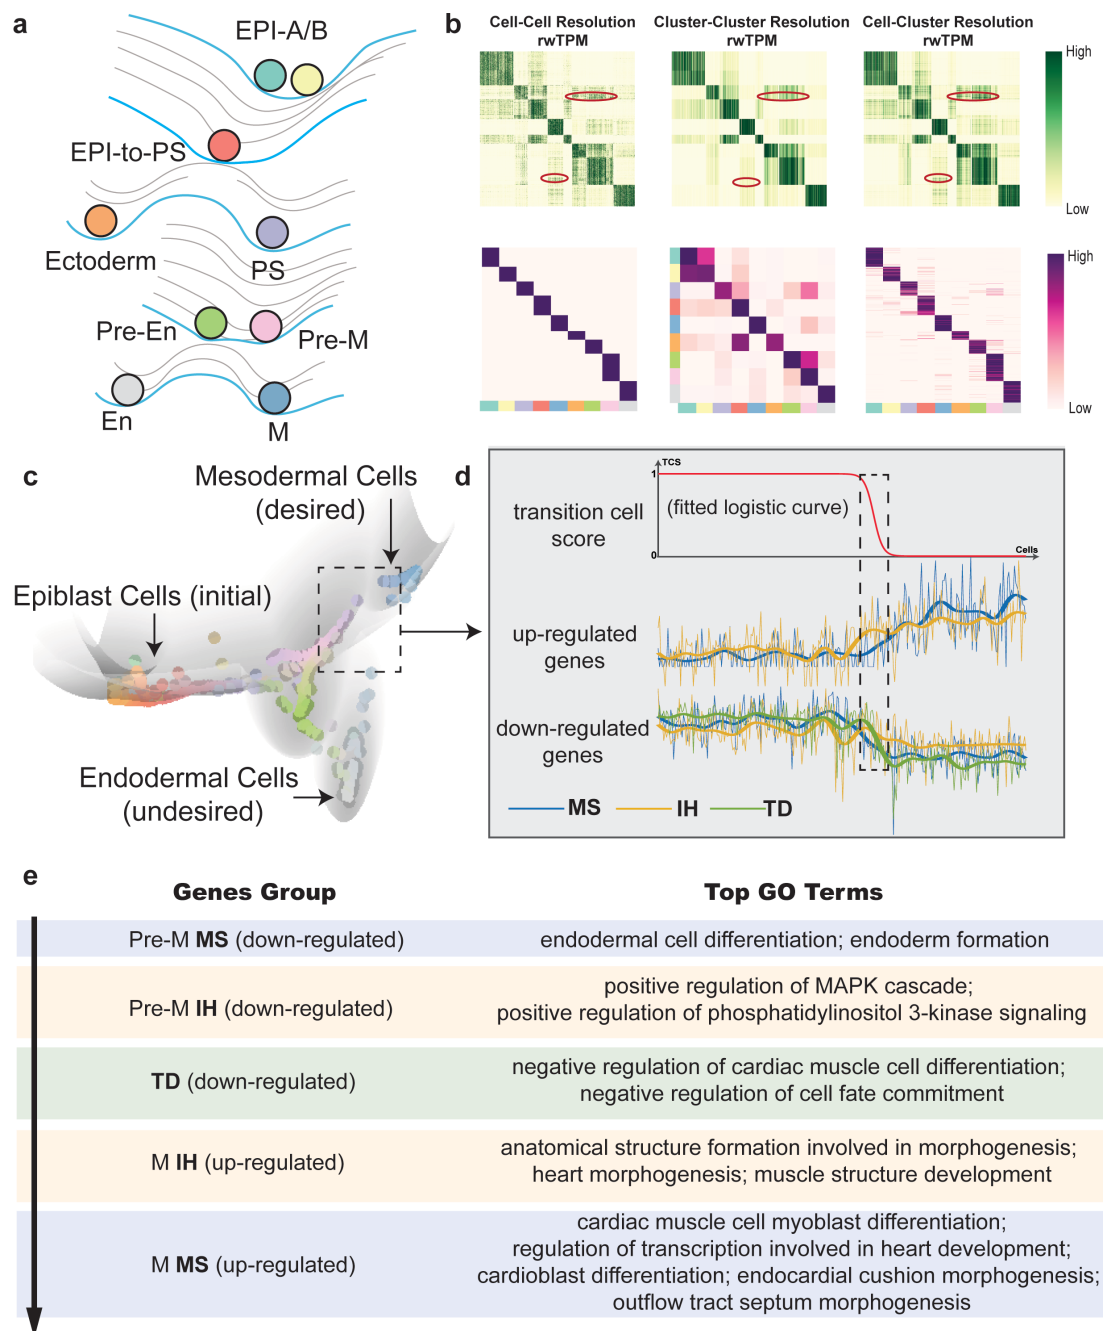

**Figure 3. MuTrans scrutinizes the cellular bifurcation and gene expression dynamics during iPSC differentiation.** (a) The schematic development landscape during iPSCs differentiation, with cell states and lineage relationship inferred by MuTrans. (b) The multi-scale quantities learned by MuTrans. (top) The learned cellular random walk transition probability matrix (rwTPM). Elements in red circle indicate that cell-cluster scale rwTPM recovers the finer resolution of cell-cell scale rwTPM than the cluster-cluster scale rwTPM. (bottom) The cell-cluster assignment (left), cluster-cluster transition probability (middle) and cell-cluster membership matrix (right) learned by MuTrans. (c) The constructed dynamical manifold (Methods and Section 2.3 in SM) reflects the dynamics from initial epiblast cells toward the final mesodermal (the desired cell fate in iPSC induction) or endodermal cells. The color of each individual

cell is computed based on the value of its soft clustering membership. (d) The Transcendental analysis of the transition from Pre-M state to M-state (details in Section 3.3 of SM). (top) The TCS of transition, with transition cells marked by dashed rectangles. Transition cells are marked by dashed squares. (middle) The average gene expression of top 5 down-regulated MS (blue) and IH (yellow) genes. The full gene name list is shown in Table S6. The thin lines represent the raw normalized expression value and thick lines denote the smoothed data. IH genes are up-regulated in both transition and metastable M cells, while the expression of MS genes is inhibited in transition cells. (bottom) The average gene expression of top 5 down-regulated MS (blue), IH (yellow) and TD (green) genes. The full gene name list is shown in Table S6. (e) GO enrichment analysis of MS, IH and TD genes during Pre-M to M state transition indicates a gradual loss of endodermal property and gain of mesodermal property in the cell-fate switch.

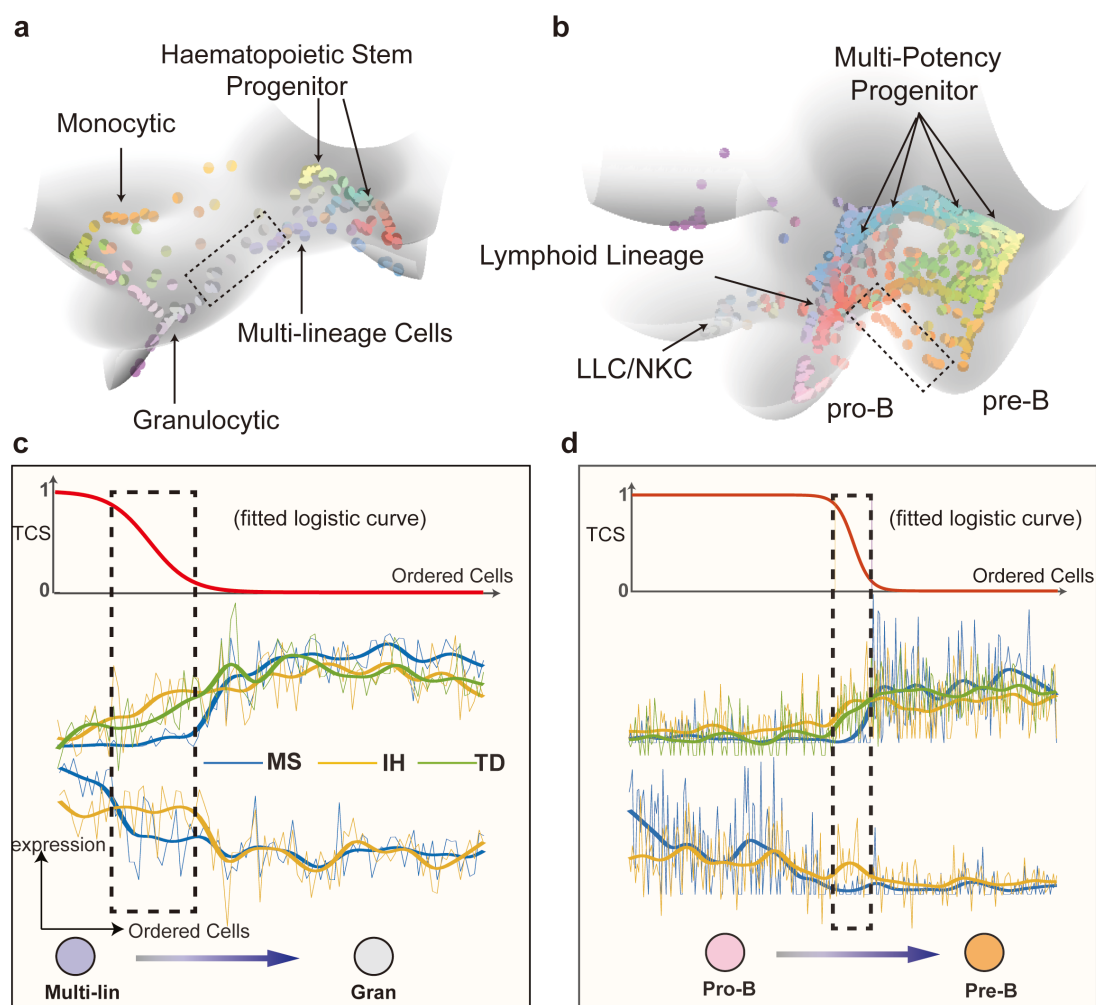

**Figure 4.** *MuTrans can robustly reveal the underlying complex dynamics in single-cell blood differentiation datasets.* (a-b) The constructed dynamical manifold by MuTrans are shown for the two datasets. The color of each individual cell in dynamical manifold is based on its soft-clustering membership. In mouse HPC dataset (left), MuTrans highlights the multi-lineage cells in a shallow pit on dynamical manifold. In the HPC dataset toward lymphoid lineages (right), MuTrans discovers plenty of transition cells exist between meta-stable PreB and B cell attractors (marked by dashed squares). (c) The TCS of transition and average gene expression of the top 5 TD (green), MS (blue) and IH (yellow) genes for the two interested transition paths marked with dash in (a). The full gene lists are shown in Table S7-9.



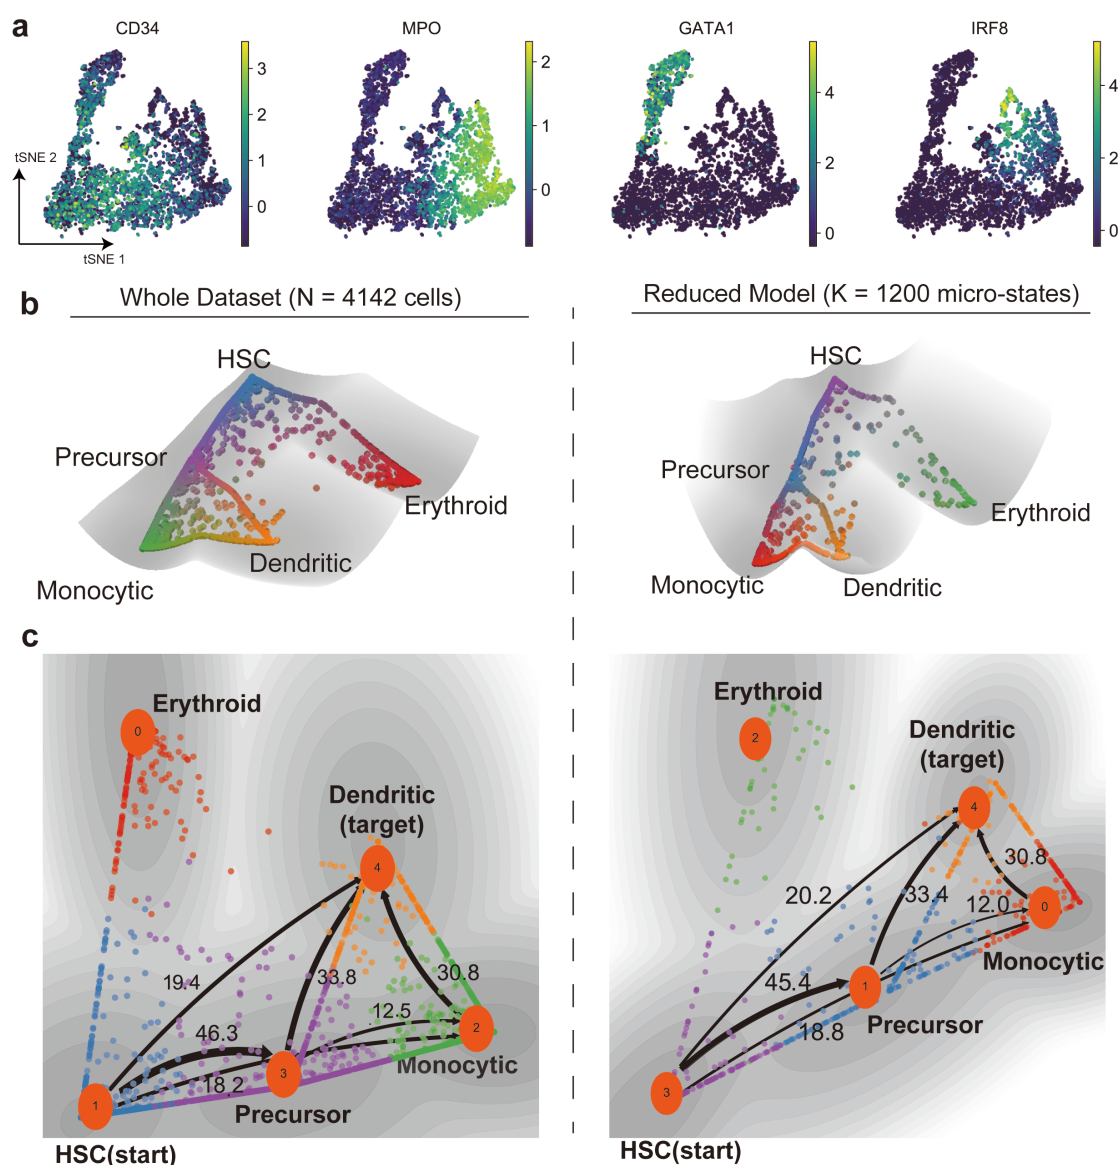

**Figure 5.** Application to a large dataset using multiscale reduction approach. (a) The tSNE plot and marker gene expression of datasets from early human HSC differentiation in bone marrow. (b) The dynamical manifold constructed from complete dataset (left, N=4,142 cells) and with DECLARE pre-processing (right, K=1,200 micro-states) with cells colored by soft clustering membership in MuTrans attractors. Left panel: each ball represents one cell; right panel: each ball represents one micro-state. The reduced model preserves the overall structure of dynamical manifold. (c) The transition paths analysis conducted on complete data (left) and with DECLARE pre-processing (right), where HSC are picked as the start and dendritic cells as the target. The numbers indicate the relative likelihood of each transition path, suggesting the quantitative consistency of reduced model with the analysis on whole dataset.

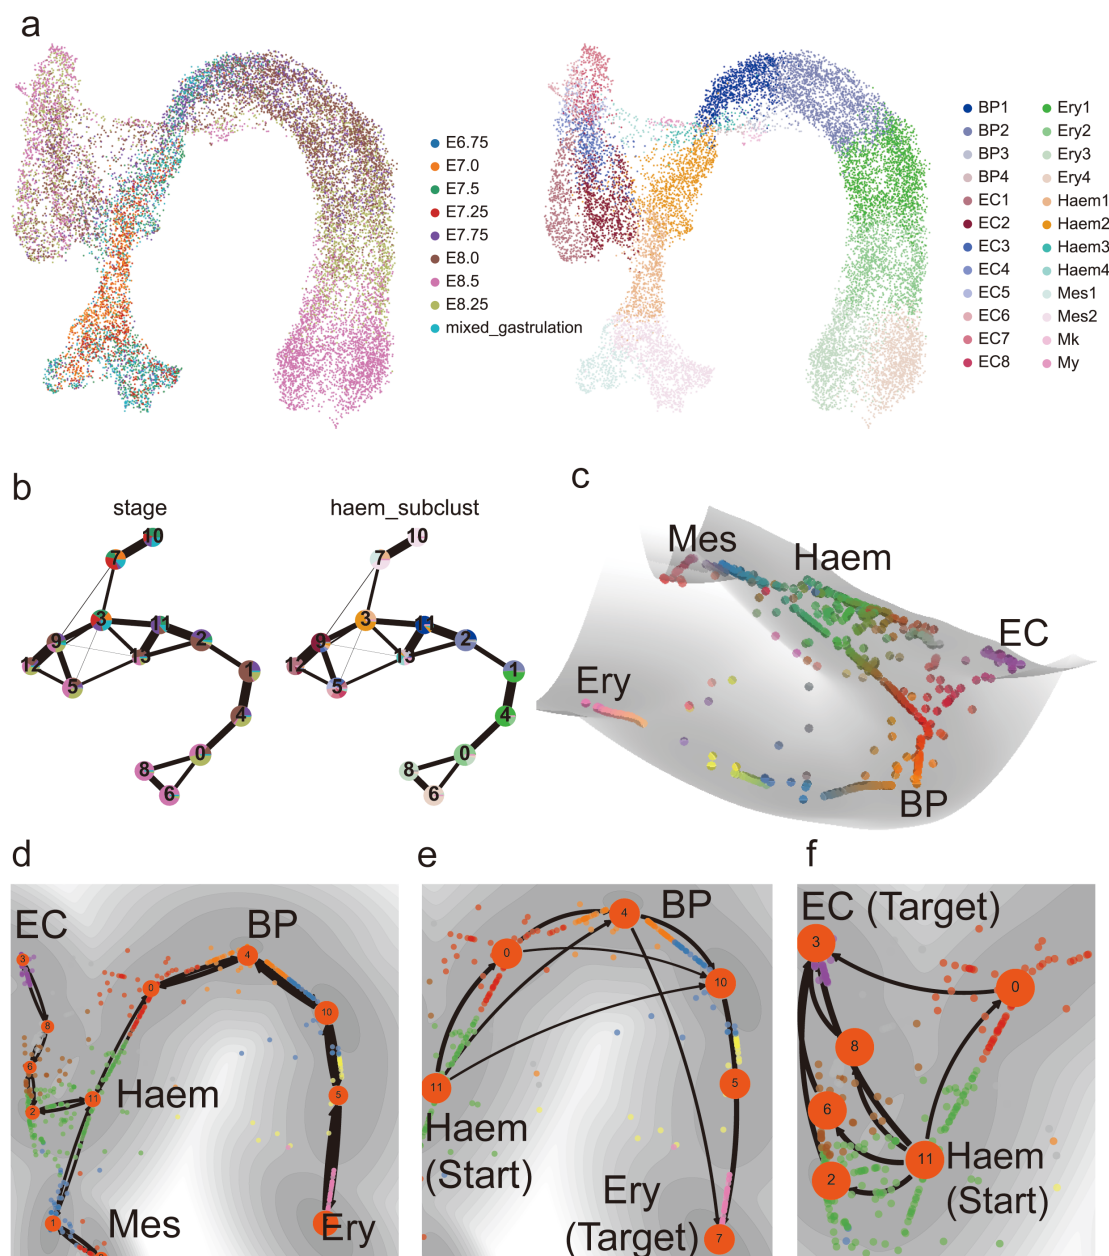

**Figure 6.** Application to a dataset on blood cell differentiation in mouse gastrulation ( $N=15,875$  cells). (a) The UMAP plot with cells colored by experimental collection time (left) and the cell annotations in original publication (right). (b) The cell lineage inferred by PAGA, however, with the coarse-grained states colored by experimental collection time (left) and the cell annotations in the original study (right). (c) The dynamical manifold constructed by MuTrans with DECLARE pre-processing ( $K=1,500$  micro-states), with cells colored by soft clustering membership in MuTrans attractors. (d) The global cell lineage inferred by MuTrans MPFT (most probable flow tree) algorithm. (e) Zoom-in of the dominant transition paths from Haem cells to endothelial cells. (f) Zoom-in of the dominant transition paths from Haem cells to erythrocytic cells.

## References

- 684 1. Svensson V, Vento-Tormo R, Teichmann SA. Exponential scaling of single-cell  
685 RNA-seq in the past decade. *Nature protocols*. 2018;13(4):599-.
- 686 2. Jin S, MacLean AL, Peng T, Nie Q. scEpath: energy landscape-based inference of  
687 transition probabilities and cellular trajectories from single-cell transcriptomic data.  
688 *Bioinformatics*. 2018;34(12):2077-86.
- 689 3. Brackston RD, Lakatos E, Stumpf MPH. Transition state characteristics during cell  
690 differentiation. *PLoS Computational Biology*. 2018;14(9):e1006405.
- 691 4. Moris N, Pina C, Arias AM. Transition states and cell fate decisions in epigenetic  
692 landscapes. *Nature Reviews Genetics*. 2016;17(11):693-703.
- 693 5. MacLean AL, Hong T, Nie Q. Exploring intermediate cell states through the lens  
694 of single cells. *Current Opinion in Systems Biology*. 2018;9:32-41.
- 695 6. Ohgushi M, Sasai Y. Lonely death dance of human pluripotent stem cells:  
696 ROCKing between metastable cell states. *Trends in Cell Biology*. 2011;21(5):274-82.
- 697 7. Haghverdi L, Buttner M, Wolf FA, Buettner F, Theis FJ. Diffusion pseudotime  
698 robustly reconstructs lineage branching. *Nature Methods*. 2016;13(10):845-8.
- 699 8. Sha Y, Haensel D, Gutierrez G, Du H, Dai X, Nie Q. Intermediate cell states in  
700 epithelial-to-mesenchymal transition. *Phys Biol*. 2019;16(2):021001.
- 701 9. Luecken MD, Theis FJ. Current best practices in single-cell RNA-seq analysis: a  
702 tutorial. *Mol Syst Biol*. 2019;15(6):e8746.
- 703 10. Ho YJ, Anaparthi N, Molik D, Mathew G, Aicher T, Patel A, et al. Single-cell  
704 RNA-seq analysis identifies markers of resistance to targeted BRAF inhibitors in  
705 melanoma cell populations. *Genome Research*. 2018;28(9):1353-63.
- 706 11. Kiselev VY, Kirschner K, Schaub MT, Andrews T, Yiu A, Chandra T, et al. SC3:  
707 consensus clustering of single-cell RNA-seq data. *Nature Methods*. 2017;14(5):483-6.
- 708 12. Wang B, Zhu J, Pierson E, Ramazzotti D, Batzoglou S. Visualization and analysis  
709 of single-cell RNA-seq data by kernel-based similarity learning. *Nat Methods*.  
710 2017;14(4):414-6.
- 711 13. Herring CA, Banerjee A, McKinley ET, Simmons AJ, Ping J, Roland JT, et al.  
712 Unsupervised Trajectory Analysis of Single-Cell RNA-Seq and Imaging Data Reveals  
713 Alternative Tuft Cell Origins in the Gut. *Cell Systems*. 2018;6(1):37-51 e9.
- 714 14. Street K, Risso D, Fletcher RB, Das D, Ngai J, Yosef N, et al. Slingshot: cell lineage  
715 and pseudotime inference for single-cell transcriptomics. *BMC Genomics*.  
716 2018;19(1):477.
- 717 15. Qiu X, Mao Q, Tang Y, Wang L, Chawla R, Pliner HA, et al. Reversed graph  
718 embedding resolves complex single-cell trajectories. *Nat Methods*. 2017;14(10):979-  
719 82.
- 720 16. Zhu L, Lei J, Klei L, Devlin B, Roeder K. Semisoft clustering of single-cell data.  
721 *Proceedings of the National Academy of Sciences*. 2019;116(2):466-71.
- 722 17. Zhou P, Gao X, Li X, Li L, Niu C, Ouyang Q, et al. Stochasticity Triggers  
723 Activation of the S-phase Checkpoint Pathway in Budding Yeast. *Physical Review X*.  
724 2021;11(1):011004.

- 725 18. Qiu X, Zhang Y, Yang D, Hosseinzadeh S, Wang L, Yuan R, et al. Mapping vector  
726 field of single cells. *Biorxiv*. 2019:696724.
- 727 19. Gillespie DT. The chemical Langevin equation. *The Journal of Chemical Physics*.  
728 2000;113(1):297-306.
- 729 20. Aurell E, Sneppen K. Epigenetics as a First Exit Problem. *Physical Review Letters*.  
730 2002;88(4):048101.
- 731 21. Ferrell James E. Bistability, Bifurcations, and Waddington's Epigenetic Landscape.  
732 *Current Biology*. 2012;22(11):R458-R66.
- 733 22. Farrell JA, Wang Y, Riesenfeld SJ, Shekhar K, Regev A, Schier AF. Single-cell  
734 reconstruction of developmental trajectories during zebrafish embryogenesis. *Science*.  
735 2018;360(6392).
- 736 23. Wagner DE, Weinreb C, Collins ZM, Briggs JA, Megason SG, Klein AM. Single-  
737 cell mapping of gene expression landscapes and lineage in the zebrafish embryo.  
738 *Science*. 2018;360(6392):981-7.
- 739 24. Van Kampen NG. *Stochastic processes in physics and chemistry*: Elsevier; 1992.
- 740 25. Shi J, Li T, Chen L. Towards a critical transition theory under different temporal  
741 scales and noise strengths. *Physical Review E*. 2016;93(3):032137.
- 742 26. Pastushenko I, Brisebarre A, Sifrim A, Fioramonti M, Revenco T, Boumahdi S, et  
743 al. Identification of the tumour transition states occurring during EMT. *Nature*.  
744 2018;556(7702):463-+.
- 745 27. Bargaje R, Trachana K, Shelton MN, McGinnis CS, Zhou JX, Chadick C, et al.  
746 Cell population structure prior to bifurcation predicts efficiency of directed  
747 differentiation in human induced pluripotent cells. *Proceedings of the National*  
748 *Academy of Sciences*. 2017;114(9):2271-6.
- 749 28. Jia C, Zhang MQ, Qian H. Emergent Levy behavior in single-cell stochastic gene  
750 expression. *Phys Rev E*. 2017;96(4-1):040402.
- 751 29. Olsson A, Venkatasubramanian M, Chaudhri VK, Aronow BJ, Salomonis N, Singh  
752 H, et al. Single-cell analysis of mixed-lineage states leading to a binary cell fate choice.  
753 *Nature*. 2016;537(7622):698-702.
- 754 30. Herman JS, Sagar, Grun D. FateID infers cell fate bias in multipotent progenitors  
755 from single-cell RNA-seq data. *Nat Methods*. 2018;15(5):379-86.
- 756 31. Setty M, Kiseliovas V, Levine J, Gayoso A, Mazutis L, Pe'er D. Characterization  
757 of cell fate probabilities in single-cell data with Palantir. *Nat Biotechnol*.  
758 2019;37(4):451-60.
- 759 32. Wolf FA, Hamey FK, Plass M, Solana J, Dahlin JS, Gottgens B, et al. PAGA: graph  
760 abstraction reconciles clustering with trajectory inference through a topology  
761 preserving map of single cells. *Genome Biol*. 2019;20(1):59.
- 762 33. Pijuan-Sala B, Griffiths JA, Guibentif C, Hiscock TW, Jawaid W, Calero-Nieto FJ,  
763 et al. A single-cell molecular map of mouse gastrulation and early organogenesis.  
764 *Nature*. 2019;566(7745):490-5.

- 765 34. Wang J, Zhang K, Xu L, Wang E. Quantifying the Waddington landscape and  
766 biological paths for development and differentiation. *P Natl Acad Sci USA*.  
767 2011;108(20):8257-62.
- 768 35. Zhou P, Li T. Construction of the landscape for multi-stable systems: Potential  
769 landscape, quasi-potential, A-type integral and beyond. *The Journal of Chemical*  
770 *Physics*. 2016;144(9):094109.
- 771 36. Huang S, Li F, Zhou JX, Qian H. Processes on the emergent landscapes of  
772 biochemical reaction networks and heterogeneous cell population dynamics:  
773 differentiation in living matters. *J R Soc Interface*. 2017;14(130).
- 774 37. Elowitz MB, Levine AJ, Siggia ED, Swain PS. Stochastic gene expression in a  
775 single cell. *Science*. 2002;297(5584):1183-6.
- 776 38. Weinreb C, Wolock S, Tusi BK, Socolovsky M, Klein AM. Fundamental limits on  
777 dynamic inference from single-cell snapshots. *Proc Natl Acad Sci U S A*.  
778 2018;115(10):E2467-E76.
- 779 39. Zhang J, Nie Q, Zhou T. Revealing Dynamic Mechanisms of Cell Fate Decisions  
780 From Single-Cell Transcriptomic Data. *Front Genet*. 2019;10:1280.
- 781 40. Grun D. Revealing dynamics of gene expression variability in cell state space. *Nat*  
782 *Methods*. 2020;17(1):45-9.
- 783 41. Zheng X, Jin S, Nie Q, Zou X. scRCMF: Identification of cell subpopulations and  
784 transition states from single cell transcriptomes. *IEEE Trans Biomed Eng*. 2019.
- 785 42. Korsunsky I, Millard N, Fan J, Slowikowski K, Zhang F, Wei K, et al. Fast,  
786 sensitive and accurate integration of single-cell data with Harmony. *Nat Methods*.  
787 2019;16(12):1289-96.
- 788 43. Iacono G, Mereu E, Guillaumet-Adkins A, Corominas R, Cusco I, Rodriguez-  
789 Esteban G, et al. bigScale: an analytical framework for big-scale single-cell data.  
790 *Genome Res*. 2018;28(6):878-90.
- 791 44. Baran Y, Bercovich A, Sebe-Pedros A, Lubling Y, Giladi A, Chomsky E, et al.  
792 MetaCell: analysis of single-cell RNA-seq data using K-nn graph partitions. *Genome*  
793 *Biol*. 2019;20(1):206.
- 794 45. La Manno G, Soldatov R, Zeisel A, Braun E, Hochgerner H, Petukhov V, et al.  
795 RNA velocity of single cells. *Nature*. 2018;560(7719):494-8.
- 796 46. Bergen V, Lange M, Peidli S, Wolf FA, Theis FJ. Generalizing RNA velocity to  
797 transient cell states through dynamical modeling. *Nat Biotechnol*. 2020;38(12):1408-  
798 14.
- 799 47. Li T, Shi J, Wu Y, Zhou P. On the Mathematics of RNA Velocity I: Theoretical  
800 Analysis. *bioRxiv*. 2020.
- 801 48. Shi J, Teschendorff AE, Chen W, Chen L, Li T. Quantifying Waddington's  
802 epigenetic landscape: a comparison of single-cell potency measures. *Brief Bioinform*.  
803 2018.
- 804 49. Guillemin A, Roesch E, Stumpf MPH. Uncertainty in cell fate decision making:  
805 Lessons from potential landscapes of bifurcation systems. *bioRxiv*.  
806 2021:2021.01.03.425143.

- 807 50. Pinski F, Stuart A. Transition paths in molecules at finite temperature. The Journal  
808 of Chemical Physics. 2010;132(18):184104.
- 809 51. E W, Li T, Vanden-Eijnden E. Optimal partition and effective dynamics of complex  
810 networks. Proceedings of the National Academy of Sciences. 2008;105(23):7907-12.
- 811 52. Scherer MK, Trendelkamp-Schroer B, Paul F, Pérez-Hernández G, Hoffmann M,  
812 Plattner N, et al. PyEMMA 2: A Software Package for Estimation, Validation, and  
813 Analysis of Markov Models. Journal of Chemical Theory and Computation.  
814 2015;11(11):5525-42.
- 815 53. Pearce P, Woodhouse FG, Forrow A, Kelly A, Kusumaatmaja H, Dunkel J.  
816 Learning dynamical information from static protein and sequencing data. Nature  
817 Communications. 2019;10(1):5368.
- 818
